# Supplementary material for: Lactate Clearance as a Surrogate for Mortality in Cardiogenic Shock: Insights From the DOREMI Trial
Source: PubMed Central journal article supplement — J Am Heart Assoc. 2022 Mar 9;11(6):e023322. doi: 10.1161/JAHA.121.023322 (PMC9075306; doi:10.1161/jaha.121.023322), 2022-03-09
Supplement: JAH3-11-e023322-s001.pdf [file JAH3-11-e023322-s001.pdf]

# **SUPPLEMENTAL MATERIAL**

|                                                                                                                                     |   |
|-------------------------------------------------------------------------------------------------------------------------------------|---|
| Table S1. Baseline Characteristics and Clinical Outcomes in patients with normal compared to elevated baseline lactate levels ..... | 3 |
| Table S2. Absolute lactate levels grouped by survivors and non-survivors .....                                                      | 5 |
| Table S3. Complete lactate clearance grouped by survivors and non-survivors .....                                                   | 6 |
| Table S4. Lactate clearance grouped by survivors and non-survivors .....                                                            | 7 |
| Table S5. Multivariate logistic regression analysis assessing the relation between clinical variable and in-hospital survival ..... | 8 |

**Table S1. Baseline Characteristics and Clinical Outcomes in patients with normal compared to elevated baseline lactate levels**

| Baseline Characteristics                        | Normal Lactate (N = 50) | Elevated Lactate (N = 142) | P Value |
|-------------------------------------------------|-------------------------|----------------------------|---------|
| Age, mean (SD), yrs                             | 71.0 (13.3)             | 70.3 (12.6)                | 0.57    |
| Male, No. (%)                                   | 28 (56.0)               | 94 (66.2)                  | 0.2     |
| Body mass index, mean (SD), kg/m <sup>2</sup>   | 27.1 (6.0)              | 27.5 (5.8)                 | 0.82    |
| Ethnicity                                       |                         |                            | 0.79    |
| Caucasian                                       | 42 (84.0)               | 123 (86.6)                 |         |
| Black                                           | 1 (2.0)                 | 4 (2.8)                    |         |
| Asian                                           | 4 (8.0)                 | 7 (4.9)                    |         |
| Middle Eastern                                  | 3 (6.0)                 | 6 (4.2)                    |         |
| Other                                           | 0 (0)                   | 2 (1.4)                    |         |
| Medical History, No. (%)                        |                         |                            |         |
| Diabetes                                        | 28 (56.0)               | 74 (52.1)                  | 0.64    |
| Previous myocardial infarction                  | 18 (36.0)               | 50 (35.2)                  | 0.92    |
| Previous Coronary bypass grafting               | 7 (14.0)                | 32 (22.5)                  | 0.20    |
| Previous stroke or TIA                          | 5 (10.0)                | 23 (16.2)                  | 0.29    |
| Previous percutaneous coronary intervention     | 14 (28.0)               | 35 (24.6)                  | 0.64    |
| Atrial fibrillation                             | 21 (42.0)               | 74 (52.1)                  | 0.22    |
| Chronic kidney disease                          | 18 (36.0)               | 32 (22.5)                  | 0.06    |
| Chronic obstructive pulmonary disease           | 5 (5.0)                 | 20 (14.1)                  | 0.46    |
| Chronic liver disease                           | 5 (10.0)                | 8 (5.6)                    | 0.29    |
| Home medications prior to presentation, No. (%) |                         |                            |         |
| ASA                                             | 41 (82.1)               | 86 (60.6)                  | 0.006   |
| P2Y12 Inhibitor                                 | 34 (68.0)               | 65 (45.8)                  | 0.007   |
| Warfarin                                        | 2 (4.0)                 | 19 (13.4)                  | 0.07    |
| Direct oral anticoagulant                       | 3 (6.0)                 | 36 (25.4)                  | 0.004   |
| Beta blocker                                    | 24 (48.0)               | 69 (48.6)                  | 0.94    |
| Statin                                          | 34 (68.0)               | 92 (64.8)                  | 0.68    |
| ACEi, ARB, or ARNI                              | 21 (42.0)               | 64 (45.1)                  | 0.71    |
| Mineralocoid receptor antagonist                | 9 (18.0)                | 20 (14.1)                  | 0.51    |
| Nitrates and/or hydralazine                     | 9 (18.0)                | 17 (12.0)                  | 0.29    |
| Diuretic                                        | 41 (82.0)               | 110 (77.5)                 | 0.5     |
| Digoxin                                         | 5 (10.0)                | 9 (6.3)                    | 0.40    |
| Baseline Clinical Characteristics               |                         |                            |         |
| Heart rate (SD), bpm                            | 83.4 (19.1)             | 93.5 (22.4)                | 0.008   |
| Mean arterial blood pressure (SD), mmHg         | 72.5 (12.0)             | 77.9 (14.1)                | 0.02    |
| Cardiac index (SD), L/min/m <sup>2</sup>        | 1.77 (0.34)             | 1.54 (0.39)                | 0.23    |

|                                                                                                                                                                                                   |              |               |         |
|---------------------------------------------------------------------------------------------------------------------------------------------------------------------------------------------------|--------------|---------------|---------|
| Systemic vascular resistance (SD) dynes·sec·cm-5                                                                                                                                                  | 1548 (436)   | 1913 (634)    | 0.19    |
| Society for Cardiovascular Angiography & Interventions (SCAI) Shock Class                                                                                                                         |              |               |         |
| SCAI B                                                                                                                                                                                            | 11 (22.0)    | 0 (0)         | < 0.001 |
| SCAI C                                                                                                                                                                                            | 35 (70.0)    | 120 (84.5)    | 0.03    |
| SCAI D                                                                                                                                                                                            | 4 (8.0)      | 18 (12.7)     | 0.37    |
| SCAI E                                                                                                                                                                                            | 0 (0)        | 4 (2.8)       | 0.23    |
| Invasive ventilation, No. (%)                                                                                                                                                                     | 15 (30.0)    | 25 (17.6)     | 0.04    |
| Intravenous vasopressors, No. (%)                                                                                                                                                                 | 28 (56.0)    | 64 (45.4)     | 0.20    |
| Intra-aortic balloon pump, No. (%)                                                                                                                                                                | 0 (0)        | 10 (7.0)      | 0.06    |
| Pulmonary artery catheter, No. (%)                                                                                                                                                                | 10 (20.0)    | 13 (9.2)      | 0.04    |
| Hemoglobin, mean (SD), g/dL                                                                                                                                                                       | 10.9 (2.13)  | 12.1 (2.39)   | 0.002   |
| Lactate, mean (SD), mmol/L                                                                                                                                                                        | 1.39 (0.32)  | 4.70 (3.24)   | <0.001  |
| Aspartate transaminase, mean (SD), units/L                                                                                                                                                        | 311 (1050)   | 670 (1116)    | <0.001  |
| Renal Function, mean (SD)                                                                                                                                                                         |              |               |         |
| Serum creatinine, mmol/L                                                                                                                                                                          | 163.8 (98.3) | 191.2 (136.4) | 0.13    |
| Estimated GFR <sup>‡</sup> , mL/min/1.73 m <sup>2</sup>                                                                                                                                           | 66.2 (38.9)  | 72.4 (38.8)   | 0.15    |
| Clinical Outcomes                                                                                                                                                                                 |              |               |         |
| MACE, No. (%)                                                                                                                                                                                     | 23 (46.0)    | 76 (53.5)     | 0.36    |
| 30-day survival, No. (%)                                                                                                                                                                          | 34 (68.0)    | 82 (57.7)     | 0.20    |
| SD – standard deviation; TIA – transient ischemic attack; ACEi – angiotensin converting enzyme inhibitor; ARB – angiotensin II receptor blocker; ARNI – angiotensin receptor-neprilysin inhibitor |              |               |         |
| <sup>‡</sup> Modification of Diet in Renal Disease equation                                                                                                                                       |              |               |         |

**Table S2. Absolute lactate levels grouped by survivors and non-survivors**

| Absolute lactate, median (IQR), mmol/L | Survivors        | Non-survivors    | P Value |
|----------------------------------------|------------------|------------------|---------|
| Baseline                               | 3.75 (2.63-5.40) | 3.70 (2.68-5.98) | 0.578   |
| 4 hours                                | 2.50 (1.80-3.30) | 2.95 (2.10-4.97) | 0.083   |
| 8 hours                                | 2.05 (1.50-2.73) | 2.40 (1.90-3.40) | 0.024   |
| 12 hours                               | 1.80 (1.30-2.18) | 2.40 (1.72-2.98) | <0.001  |
| 18 hours                               | 1.70 (1.30-2.20) | 2.05 (1.80-3.08) | <0.001  |
| 24 hours                               | 1.50 (1.30-2.08) | 2.30 (1.65-2.85) | <0.001  |
| 36 hours                               | 1.50 (1.30-1.90) | 1.95 (1.60-2.82) | <0.001  |

IQR – interquartile range

**Table S3. Complete lactate clearance grouped by survivors and non-survivors**

| Complete Lactate Clearance*, No. (%) | Total (N=142) | Survivors (N=60) | Non-survivors (N=82) | Relative Risk    | P Value |
|--------------------------------------|---------------|------------------|----------------------|------------------|---------|
| 4 hours                              | 37 (28.2)     | 25 (30.5)        | 12 (20.0)            | 0.80 (0.61-1.07) | 0.16    |
| 8 hours                              | 16 (26.7)     | 37 (45.1)        | 16 (26.7)            | 0.72 (0.55-0.95) | 0.03    |
| 12 hours                             | 78 (54.9)     | 55 (67.1)        | 23 (38.3)            | 0.60 (0.43-0.83) | < 0.01  |
| 18 hours                             | 91 (64.1)     | 63 (76.8)        | 28 (46.7)            | 0.54 (0.37-0.79) | < 0.01  |
| 24 hours                             | 103 (72.5)    | 71 (86.6)        | 32 (53.3)            | 0.41 (0.24-0.69) | < 0.01  |
| 36 hours                             | 107 (75.4)    | 74 (90.2)        | 33 (55.0)            | 0.33 (0.18-0.62) | < 0.01  |

\*Complete lactate clearance – lactate < 2 mmol/L

**Table S4. Lactate clearance grouped by survivors and non-survivors**

| Lactate Clearance 1, median (IQR), % | Survivors        | Non-survivors    | P Value |
|--------------------------------------|------------------|------------------|---------|
| 4 hours                              | 33.3 (6.45-45.8) | 20.9 (0.93-39.6) | 0.075   |
| 8 hours                              | 44.4 (13.4-59.4) | 24.4 (8.11-45.2) | 0.011   |
| 12 hours                             | 56.9 (30.6-65.3) | 26.0 (0.16-47.6) | <0.001  |
| 18 hours                             | 52.0 (29.7-69.0) | 28.8 (5.75-51.4) | 0.002   |
| 24 hours                             | 58.7 (39.3-70.3) | 37.9 (8.28-56.2) | <0.001  |
| 36 hours                             | 55.4 (43.1-71.8) | 42.4 (8.59-54.4) | <0.001  |
| Lactate Clearance 2, median (IQR), % |                  |                  |         |
| 4 hours                              | 8.33 (1.61-11.5) | 5.22 (0.23-9.90) | 0.075   |
| 8 hours                              | 5.55 (1.67-7.43) | 3.06 (1.01-5.65) | 0.011   |
| 12 hours                             | 4.74 (2.55-5.44) | 2.16 (0.01-3.97) | <0.001  |
| 18 hours                             | 2.89 (1.65-3.83) | 1.60 (0.32-2.86) | 0.002   |
| 24 hours                             | 2.45 (1.64-2.93) | 1.58 (0.35-2.34) | <0.001  |
| 36 hours                             | 1.54 (1.20-1.99) | 1.18 (0.24-1.51) | <0.001  |
| IQR – interquartile range            |                  |                  |         |

**Table S5. Multivariate logistic regression analysis assessing the relation between clinical variable and in-hospital survival**

|                            | <b>6-8 Hours</b> |                         |         |            |                         |         |            |                         |         |
|----------------------------|------------------|-------------------------|---------|------------|-------------------------|---------|------------|-------------------------|---------|
|                            | Odds Ratio       | 95% Confidence Interval | P Value | Odds Ratio | 95% Confidence Interval | P Value | Odds Ratio | 95% Confidence Interval | P Value |
| Age                        | 0.94             | 0.91 – 0.98             | <0.01   | 0.94       | 0.91 – 0.98             | <0.01   | 0.95       | 0.92 – 0.98             | <0.01   |
| Baseline MAP               | 1.04             | 1.00 – 1.08             | 0.04    | 1.04       | 1.00 – 1.08             | 0.04    | 1.03       | 1.00 – 1.07             | 0.03    |
| Mechanical Ventilation     | 0.18             | 0.06 – 0.50             | <0.01   | 0.18       | 0.06 – 0.55             | <0.01   | 0.28       | 0.10 – 0.79             | 0.02    |
| Lactate Clearance 1        | 1.02             | 1.00 – 1.03             | 0.01    |            |                         |         |            |                         |         |
| Lactate Clearance 2        |                  |                         |         | 1.15       | 1.03 – 1.29             | 0.01    |            |                         |         |
| Complete Lactate Clearance |                  |                         |         |            |                         |         | 2.46       | 1.09 – 5.55             | 0.03    |
|                            | <b>12 Hours</b>  |                         |         |            |                         |         |            |                         |         |
|                            | Odds Ratio       | 95% Confidence Interval | P Value | Odds Ratio | 95% Confidence Interval | P Value | Odds Ratio | 95% Confidence Interval | P Value |
| Age                        | 0.95             | 0.91 – 0.98             | <0.01   | 0.95       | 0.91 – 0.98             | <0.01   | 0.94       | 0.91 – 0.94             | <0.01   |
| Baseline MAP               | 1.05             | 1.01 – 1.09             | <0.01   | 1.05       | 1.01 – 1.10             | <0.01   | 1.04       | 1.00 – 1.07             | 0.03    |
| Mechanical Ventilation     | 0.22             | 0.07 – 0.73             | 0.01    | 0.22       | 0.07 – 0.74             | 0.01    | 0.31       | 0.11 – 0.89             | 0.03    |
| Lactate Clearance 1        | 1.02             | 1.01 – 1.04             | <0.01   |            |                         |         |            |                         |         |
| Lactate Clearance 2        |                  |                         |         | 1.31       | 1.12 – 1.53             | <0.01   |            |                         |         |
| Complete Lactate Clearance |                  |                         |         |            |                         |         | 3.98       | 1.76 – 8.99             | <0.01   |
|                            | <b>18 Hours</b>  |                         |         |            |                         |         |            |                         |         |
|                            | Odds Ratio       | 95% Confidence Interval | P Value | Odds Ratio | 95% Confidence Interval | P Value | Odds Ratio | 95% Confidence Interval | P Value |
| Age                        | 0.94             | 0.91 – 0.98             | <0.01   | 0.94       | 0.91 – 0.98             | <0.01   | 0.95       | 0.91 – 0.98             | <0.01   |
| Baseline MAP               | 1.04             | 1.00 – 1.08             | 0.05    | 1.04       | 1.00 – 1.08             | 0.05    | 1.03       | 1.00 – 1.07             | 0.04    |
| Mechanical Ventilation     | 0.15             | 0.04 – 0.52             | <0.01   | 0.15       | 0.04 – 0.52             | <0.01   | 0.29       | 0.10 – 0.84             | 0.02    |
| Lactate Clearance 1        | 1.02             | 1.01 – 1.03             | <0.01   |            |                         |         |            |                         |         |
| Lactate Clearance 2        |                  |                         |         | 1.33       | 1.10 – 1.61             | <0.01   |            |                         |         |
| Complete Lactate Clearance |                  |                         |         |            |                         |         | 3.68       | 1.62 – 8.38             | <0.01   |
|                            | <b>24 Hours</b>  |                         |         |            |                         |         |            |                         |         |
|                            | Odds Ratio       | 95% Confidence Interval | P Value | Odds Ratio | 95% Confidence Interval | P Value | Odds Ratio | 95% Confidence Interval | P Value |
| Age                        | 0.96             | 0.92 – 0.99             | 0.03    | 0.96       | 0.92 – 0.99             | 0.03    | 0.95       | 0.92 – 0.99             | <0.01   |
| Baseline MAP               | 1.02             | 0.98 – 1.06             | 0.35    | 1.02       | 0.98 – 1.06             | 0.35    | 1.03       | 0.99 – 1.07             | 0.05    |
| Mechanical Ventilation     | 0.15             | 0.04 – 0.51             | <0.01   | 0.15       | 0.04 – 0.51             | <0.01   | 0.25       | 0.08 – 0.74             | 0.01    |
| Lactate Clearance 1        | 1.03             | 1.01 – 1.05             | <0.01   |            |                         |         |            |                         |         |
| Lactate Clearance 2        |                  |                         |         | 1.96       | 1.30 – 2.96             | <0.01   |            |                         |         |



|                                  |  |  |  |  |  |  |      |             |       |
|----------------------------------|--|--|--|--|--|--|------|-------------|-------|
| Complete<br>Lactate<br>Clearance |  |  |  |  |  |  | 5.44 | 2.14 – 13.8 | <0.01 |
| MAP – mean arterial pressure     |  |  |  |  |  |  |      |             |       |
